# Supplementary material for: Amplified fluorescence polarization aptasensors based on structure-switching-triggered nanoparticles enhancement for bioassays
Source: Royal Society of Chemistry journal article supplement (doi:10.1039/c2cc33021k), 2012-01-01
Supplement: c2cc33021k.pdf [file c2cc33021k.pdf]

# Supporting Information

## Amplified Fluorescence Polarization Aptasensors Based on Structure-Switching-Triggered Nanoparticles Enhancement for Bioassays

Yong Huang,<sup>a,b</sup> Shulin Zhao,<sup>\*a</sup> Zhen-Feng Chen,<sup>a</sup> Ming Shi,<sup>a</sup> and Hong Liang<sup>\*a</sup>

Key Laboratory for the Chemistry and Molecular Engineering of Medicinal Resources (Ministry of Education), College of Chemistry and Chemical Engineering, Guangxi Normal University, Guilin 541004, China, and College of Chemistry and Chemical Engineering, Central South University, Changsha 410083, China

E-mail: zhaoshulin001@163.com; hliang@gxnu.edu.cn

Tel: (+86) 773 5856104

Fax: (+86) 773-583-2294

## Materials and Methods

**Materials:** All oligonucleotides were purchased from the Sangon Biotech Co. (Shanghai, China) and purified by HPLC. The sequences of the involved oligonucleotides were given in Table S1. H1 and DNA-1 were used for adenosine triphosphate (ATP) detection; H2 and DNA-2 were used for assaying thrombin (Tb). Cytosine triphosphate (CTP), guanosine triphosphate (GTP), ATP, uridine triphosphate (UTP), Tb, and other proteins were obtained from Sigma-Aldrich. The amino-modified silica nanoparticles ( $\text{SiO}_2$  NPs) of different diameter sizes, i.e. 25, 50, 75, and 100 nm, were obtained from Polyscience. All other chemicals were of analytical grade. The water was purified by employing a Milli-Q plus 185 equip from Millipore (Bedford, MA, USA), and used throughout the work.

**Preparation of DNA- $\text{SiO}_2$  NP conjugates:** The  $\text{SiO}_2$  NPs functionalized with each DNA were based on a previous publication with minor modifications.<sup>1</sup> The amino-modified  $\text{SiO}_2$  NPs (6 mg) were activated by reaction with the heterobifunctional crosslinker 3-maleimidopropionic acid N-hydroxysuccinimide ester (4 mg) in DMSO (1 mL) at room temperature for 4 h. After centrifugation and washing with DMSO and water, the maleimido-activated particles were then mixed with 25 nmol of thiolated oligonucleotide in 5 mL phosphate buffer (0.1 M, pH 7.4) for 8 h. After that, a cysteine solution (250  $\mu\text{L}$ , 0.1M) was added into the mixture and stirred for 1 h to block free maleimido groups. Finally, the resulting particles were washed with water and phosphate buffer (0.1 M, pH 7.4). The DNA-modified  $\text{SiO}_2$  NPs were dispersed in an appropriate amount of phosphate buffer, and stored at 4 °C before use.

**Procedures for fluorescence polarization measurements:** Fluorescence polarization is a technique that provides a quantitative measure for the rotational motion of a fluorescently labeled molecule.<sup>2</sup> The fluorescence polarization value  $P$  can be calculated by Perrin equation.<sup>3</sup> In a particular surrounding, the  $P$  value of a fluorophore is proportional to its rotational relaxation time, which depends on its molecular volume. If the fluorescently labeled molecule is free in solution, it will rotate faster and, hence, will have relatively small  $P$  value. When the fluorescently labeled molecule is bound with another large molecule to form a complex, it rotates slowly and the  $P$  value will increase. From the principle described above, it is clearly that the  $P$  value will significantly increase when a fluorophore-labeled oligonucleotide binds a larger molecule (SiO<sub>2</sub> NP-functionalized DNA).

For amplified assay, 1.0  $\mu$ L DNA-1-modified SiO<sub>2</sub> NPs solution (corresponding to 4  $\mu$ M of DNA) and 1.0  $\mu$ L FAM-labeled aptamer hairpin (2.0  $\mu$ M) were added to a 1.5 mL vial containing 997  $\mu$ L of 20 mM Tris-HCl solutions (100 mM NaCl, 5 mM MgCl<sub>2</sub>, pH 7.4). Subsequently, 1  $\mu$ L of target solution with different concentration or other analogue molecules solution was added, and the solution was incubated in the vial for 1 h before fluorescence polarization measurement. 300  $\mu$ L of final solution was used for fluorescence polarization measurements. The control experiments using non-modified DNA and FAM-labeled aptamer hairpin were carried out under identical conditions. All experiments were repeated three times. Each sample was measured five times. FP measurements were performed on an FL3-P-TCSPC system (Jobin Yvon, Inc., Edison, NJ, USA). Fluorescence polarization of the sample solution was monitored by exciting the sample at 494 nm and measuring the emission at 520 nm. And slits for both the excitation and the emission were set at 3 nm.

**Application study:** To investigate the application potential of the proposed FP aptasensor in real samples, we applied the proposed assay for the detection of Tb (as a model) in healthy human serum. As shown in Figure S3, the FP values of the system remained almost unchanged. This indicated that no Tb was detected in the serum sample. This was due to the fact that healthy human serum sample does not contain thrombin.<sup>4,5</sup> To examine the applicability of this aptasensor in serum sample, we performed spike experiments. The 10-fold diluted serum sample was spiked with 5 pM, 100 pM and 100 nM Tb, and then analyzed. The FP values in Tb spiked serum samples were slightly lower (< 4%) than that obtained in Tris buffer solutions (Figure S3). These results indicated the potentiality of the proposed FP aptasensor for Tb detection in real biological samples.

**Methods comparison:** Table S2 compares the sensitivities and range of response of the proposed FP aptasensors with other homogeneous optical aptasensors. As can be seen, the sensitivities of the proposed FP aptasensors were much higher than that of traditional homogeneous aptasensors,<sup>6,7,9,10,12-15</sup> and also better than other amplification methods.<sup>8,11,16</sup> Moreover, the proposed FP aptasensors also exhibited wider dynamic range than other methods. In addition, the relative standard deviation (n=10) for ten replicate detections of both ATP (80 pM, 10 nM, and 1  $\mu$ M) and Tb (4 pM, 100 pM, 500 nM) was less than 4.3%. This indicated the good reproducibility of our method.

## References

- 1 (a) Y. Weizmann, F. Patolsky, O. Lioubashevski and I. Willner, *J. Am. Chem. Soc.*, 2004, **126**, 1073; (b) Y. Weizmann, F. Patolsky, E. Katz and I. Willner, 2004, **5**, 943.

- 2 New Trends in Fluorescence Spectroscopy. Applications to Chemical and Life Sciences (Eds.: B. Valeur, J. C. Brochon), Springer, Berlin, 2001.
- 3 J. R. Lakowicz, Principles of Fluorescence Spectroscopy, 3rd ed., Springer, New York, 2006.
- 4 S. Centi, S. Tombelli, M. Minunni and M. Mascini, *Anal. Chem.*, 2007, **79**, 1466.
- 5 M. A. Rahman, J. I. Son, M.-S. Won and Y.-B. Shim, *Anal. Chem.*, 2009, **81**, 6604.
- 6 J. M. Liu and X. P. Yan, *Biosen. Bioelectron.*, 2012, <http://dx.doi.org/10.1016/j.bios.2012.04.015>
- 7 X. Liu, R. Freeman, E. Golub and I. Willner, *ACS Nano*, 2011, **5**, 7648.
- 8 X. Liu, R. Freeman and I. Willner, *Chem. Eur. J.*, 2012, **18**, 2207.
- 9 S. J. Zhen, L. Q. Chen, S. J. Xiao, Y. F. Li, P. P. Hu, L. Zhan, L. Peng, E. Q. Song and C. Z. Huang, *Anal. Chem.*, 2010, **82**, 8432.
- 10 L. Zhang, H. Wei, J. Li, T. Li, D. Li, Y. Li and E. Wang, *Biosen. Bioelectron.*, 2010, **25**, 1897.
- 11 C. H. Lu, J. Li, M. H. Lin, Y. W. Wang, H. H. Yang, X. Chen and G.N. Chen, *Angew. Chem. Int. Ed.*, 2010, **49**, 8454.
- 12 R. Yang, Z. Tang, J. Yan, H. Kang, Y. Kim, Z. Zhu and W. Tan, *Anal. Chem.*, 2008, **80**, 7408.
- 13 C. H. Lu, H. H. Yang, C. L. Zhu, X. Chen and G. N. Chen, *Angew. Chem., Int. Ed.*, 2009, **48**, 4785.
- 14 H. Zhang and D. Zhou, *Chem. Commun.*, 2012, **48**, 5097.
- 15 D. Zhang, Q. Zhao, B. Zhao and H. Wang, *Anal. Chem.*, 2012, **84**, 3070.
- 16 A. X. Zheng, J. R. W., J. Li, X. R. Song, G. N. Chen and H.H. Yang, *Chem. Commun.*, 2012, **48**, 374.

**Table S1.** Sequences of DNA used in this work

| Strand | Sequence*                                                                                            |
|--------|------------------------------------------------------------------------------------------------------|
| H1     | 5'-<br><u>CCCAGGTAACAAGAAAGCCAAACCT</u> <u>CCTTGTTACCTGGGGGA</u><br><i>GTATTGCGGAGGAAGGT</i> -FAM-3' |
| H2     | 5'-<br><u>CACCAACCAACA</u> <u>AGAAAGCCAAACCTGAT</u> <u>GTTGGTTGGTGT</u><br><i>GGTTGG</i> -FAM-3'     |
| DNA-1  | 5'-TTGTTACCTGGGTTTTTTTTTTT-SH-3'                                                                     |
| DNA-2  | 5'-TTGGTTGGTGTTTTTTTTTTT-SH-3'                                                                       |

\*In the hairpin sequences, stems are underlined, and aptamer nucleotides are italicized.

**Table S2.** Performance comparison between homogeneous optical aptasensors.

| Type                                       | Sensitivity  | Dynamic range            | Reference |
|--------------------------------------------|--------------|--------------------------|-----------|
| <b>ATP</b>                                 |              |                          |           |
| Gold nanoparticle-based aptasensor         | 48 nM        | 100 nM-2000 nM           | [6]       |
| G-quadruplex-based aptasensor              | 1-10 $\mu$ M | 10 $\mu$ M-1000 $\mu$ M  | [7]       |
| Exonuclease III amplification              | 0.25 $\mu$ M | 0.25 $\mu$ M-500 $\mu$ M | [8]       |
| Carbon nanotube-based aptasensor           | 0.5 $\mu$ M  | 0.8 $\mu$ M-80 $\mu$ M   | [9]       |
|                                            | 4.5 nM       | 10 nM-800 nM             | [10]      |
| Nuclease amplification                     | 40 nM        | 0.1 $\mu$ M-1000 $\mu$ M | [11]      |
| SiO <sub>2</sub> NP-enhanced FP aptasensor | 20 pM        | 40 pM-100 $\mu$ M        | This work |
| <b>Tb</b>                                  |              |                          |           |
| Carbon nanotube-based aptasensor           | 1.8 nM       | 4.0 nM-150 nM            | [12]      |
| Graphene oxide-based aptasensor            | 2.0 nM       | 5 nM-100 nM              | [13]      |
| Quantum dot-based aptasensor               | 30 pM        | 0.1 nM-10 nM             | [14]      |
| FP aptasensor                              | 250 pM       | 250 pM-8 nM              | [15]      |
| Exonuclease III amplification              | 89 pM        | 360 pM-14 nM             | [8]       |
| Nicking enzyme amplification               | 2 pM         | 5 pM-50 nM               | [16]      |
| SiO <sub>2</sub> NP-enhanced FP aptasensor | 0.3 pM       | 1 pM-1 $\mu$ M           | This work |

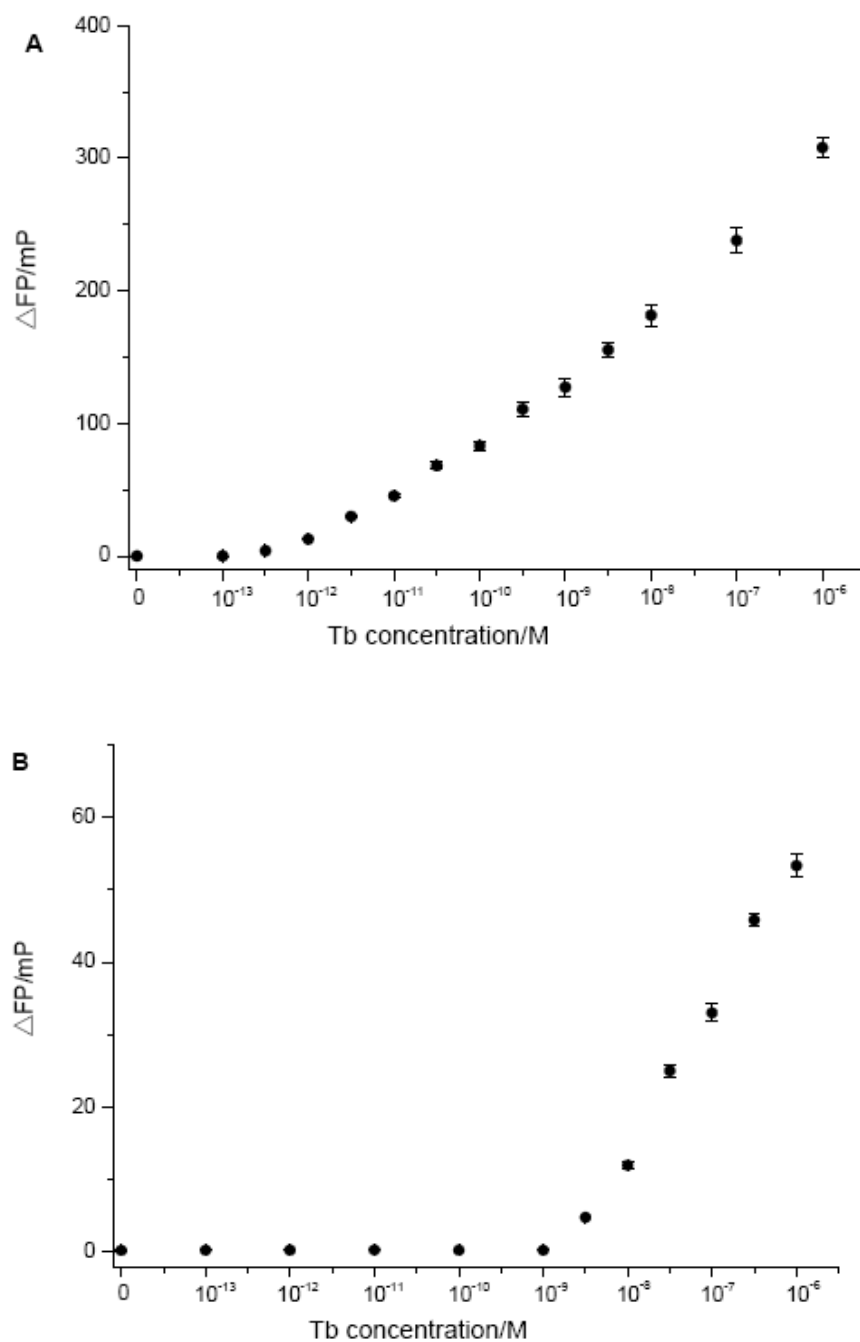

**Figure S1.** Plots of fluorescence polarization changes as a function of Tb concentrations for FAM-labeled H2/SiO<sub>2</sub> NP functionalized-DNA-2 system (A) and FAM-labeled H2/DNA-2 system (B).

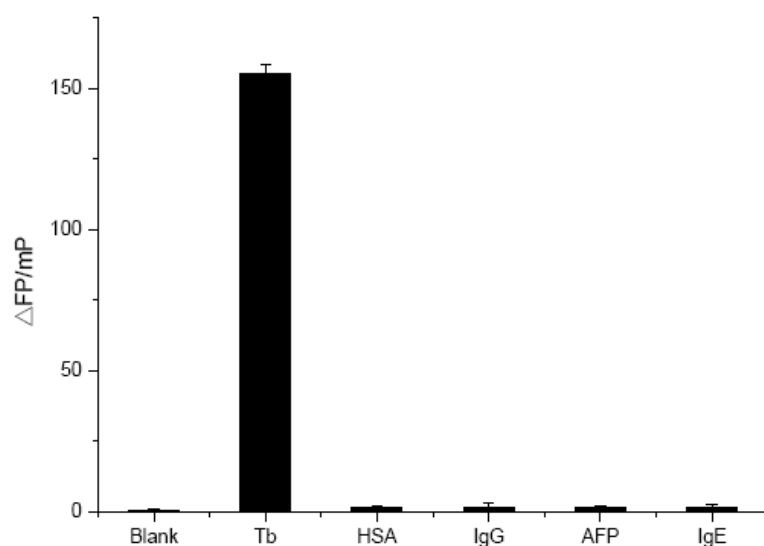

**Figure S2.** Specificity of the amplified FP aptasensor to Tb (5 nM) by comparing it to the interfering proteins at the 0.5  $\mu\text{M}$  level: HSA, IgG, AFP and IgE.

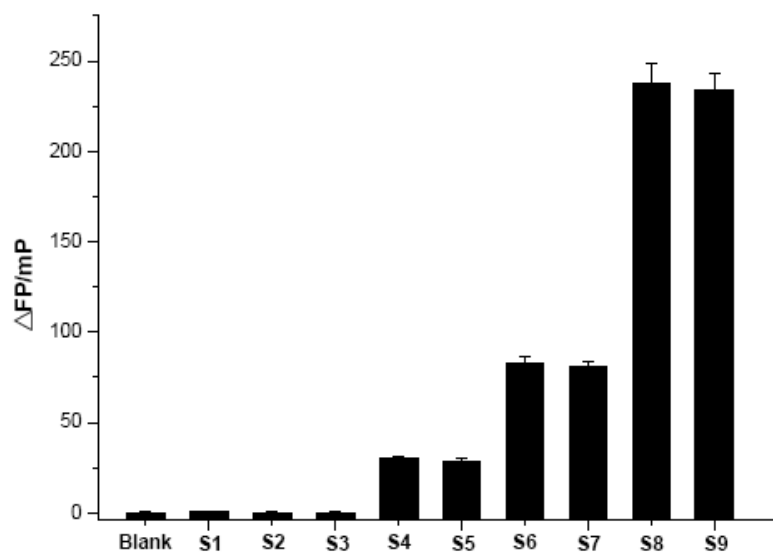

**Figure S3.** Fluorescence polarization changes upon analyzing different samples. Blank: without ATP; S1: human serum sample-1; S2: human serum sample-2; S3: human serum sample-3; S4: 5 pM Tb in Tris buffer; S5: 5 pM Tb in human serum; S6: 100 pM Tb in Tris buffer; S7: 100 pM Tb in human serum; S8: 100 nM Tb in Tris buffer; S9: 100 nM Tb in human serum.
